# Supplementary material
Source: publisher site journal article supplement (https://www.degruyterbrill.com/publication/isbn/9783839439845/downloadAsset/9783839439845_Leseprobe.pdf)
Supplement: Supplementary file 1 [file 9783839439845_Leseprobe.pdf]

Yves Bizeul,  
Stephanie Wodianka (Hg.)

# MYTHOS UND TABULA RASA

Narrationen und Denkformen  
der totalen Auslöschung  
und des absoluten Neuanfangs

[transcript] Lettre

**Aus:**

*Yves Bizeul, Stephanie Wodianka (Hg.)*

## **Mythos und Tabula rasa**

### **Narrationen und Denkformen der totalen Auslöschung und des absoluten Neuanfangs**

März 2018, 178 Seiten, kart., 29,99 €, ISBN 978-3-8376-3984-1

Totale Zerstörung, absolute Auslöschung, Tabula rasa: Inwiefern ist das narrative Gründungspotential des Mythischen an Vorstellungen eines unbedingten Neuanfangs gebunden?

Anders als die bisherige Forschung, die stets die konstruktiven Aspekte von Gründungsmythen profilierte, zeigt der Band die destruktive, Auslöschung voraussetzende oder anstrebende Dimension des Mythos auf. Dabei soll vor allem die Frage beantwortet werden, ob es eine Seite mythischer (Gründungs-)Narrative gibt, die Konstruktionen des Nullpunkts – insbesondere in Deutungskonflikten – erfordern oder begünstigen. Die Beiträge stellen aus interdisziplinärer Perspektive historische und politische Umbruchsituationen sowie narrative Strategien in den Fokus, welche Denkformen des Kahlschlags repräsentieren und deren Relation zu mythischen Gründungserzählungen illustrieren.

**Yves Bizeul** (Prof. Dr.) ist Inhaber des Lehrstuhls für Politische Theorie und Ideengeschichte an der Universität Rostock.

**Stephanie Wodianka** (Prof. Dr.) ist Inhaberin des Lehrstuhls für Französische und Italienische Literaturwissenschaft an der Universität Rostock.

Weitere Informationen und Bestellung unter:

[www.transcript-verlag.de/978-3-8376-3984-1](http://www.transcript-verlag.de/978-3-8376-3984-1)

# Inhalt

---

## **Arbeitskontext und Ausgangsfragen**

*Yves Bizeul* | 7

## **Mythos als belief system und Tabula rasa**

*Yves Bizeul* | 15

## **Mythos und Tabula rasa: Poetik des Erzählens, Erinnerung und Gedächtnis, Fläche und Raum**

*Stephanie Wodianka* | 25

## **Tabula rasa in Polen**

Zur Deutungsmachtpolitik in demokratischen Ordnungen

*André Brodocz* | 41

## **Wer hat Angst vor Cassirers »The Myth of the State«?**

Elemente eines philosophischen Krimis

*Chiara Bottici* | 59

## **›Sinn ist ein aufgeschobener Tod‹**

Anmerkungen zu Barthes' semiologischer Idee des Mythos

*Ludwig Jäger* | 77

## **›Du passé faisons table rase‹**

Vandalisme révolutionnaire und sozio-politische Regenerationsmythen während der Französischen Revolution

*Hans-Jürgen Lüsebrink* | 93

## **1940 – Die Niederlage als Ursprungsort politischer Mythen in Frankreich**

*Matthias Waechter* | 111

**»Stunde Null« und »Achtundsechzig« als Gründungsmythen  
der deutschen Nachkriegsdemokratie**

*Wolfgang Bergern* | 125

**»Und die Erde war gestaltlos und wirr ...« (Gen 1,2) –  
Mythos und Tabula rasa in der priesterschriftlichen Urgeschichte**

*Judith Gärtner* | 141

**Ist die Apokalypse ein Mythos?**

*Klaus Vondung* | 159

**Autorinnen und Autoren** | 173

# Arbeitskontext und Ausgangsfragen

---

*Yves Bizeul*

Im Rahmen des Graduiertenkollegs »Deutungsmacht: Religion und belief systems in Deutungsmachtkonflikten« wurde im Wintersemester 2015–2016 an der Universität Rostock ein Seminar zum Thema »Mythos als belief system?« veranstaltet, in dem Texte von »Klassikern« der Mythenforschung erörtert wurden.<sup>1</sup> Außerdem wurden der GRK-Workshop »Mythos als belief system«

**1** | Hier eine *Auswahl* der im Seminar besprochenen Texte: Koschorke, Albrecht: Universalität des Erzählens, in: Ders.: Wahrheit und Erfindung: Grundzüge einer Allgemeinen Erzähltheorie. Frankfurt a. M.: S. Fischer 2012, S. 9–26; Pouillon, Jean: Die mythische Funktion, in: Neue Folge, Band 220. Frankfurt a. M.: Suhrkamp 1984, S. 68–83; Barthes, Roland: Der Mythos heute, in: Ders.: Mythen des Alltags. Frankfurt a. M.: Suhrkamp: 1981, S. 251–279; Lévi-Strauss, Claude: Die Struktur der Mythen, in: Ders.: Strukturelle Anthropologie. Frankfurt a. M.: Suhrkamp 1969, S. 226–254; Wodianka, Stephanie: Mythos und Erinnerung. Mythentheoretische Modelle und ihre gedächtnistheoretischen Implikationen, in: Günter Oesterle (Hg.): Erinnerung, Gedächtnis, Wissen. Studien zur kulturwissenschaftlichen Gedächtnisforschung. Göttingen: Vandenhoeck & Ruprecht 2005, S. 211–230; Bottici, Chiara: The need for myth, in: Dies.: A Philosophy of Political Myth. Cambridge: Cambridge University Press 2007, S. 83–130; Dörner, Andreas: Politischer Mythos als semiotische Gattung, in: Ders.: Politischer Mythos und symbolische Politik. Opladen: Westdeutscher Verlag 1995, S. 76–96; Flood, Christopher: Myth and ideology, in: Kevin Schilbrack (Hg.): Thinking Through Myths. London: Routledge 2002, S. 174–190; Münkler, Herfried: Politische Mythen. Die Bewältigung von Kontingenz, die Klärung der Loyalität und die Reduktion von Komplexität, in: Vorgänge, 46/1 (2007), S. 5–11; Woltersdorff, Nicholas: Thomas Reid and the Story of Epistemology, Cambridge: Cambridge University Press 2001; Cuneo, Terence (Hg.): Nicholas Woltersdorff, Practices of Belief. Selected Essays II. Cambridge: Cambridge University Press 2014; Sandkühler, Hans Jörg: Wissen als gerechtfertigte wahre Überzeugung? Plädoyer für eine wahrheitstheoretisch bescheidene Philosophie, in: Ders.: Philosophie wozu? Frankfurt a. M.: Suhrkamp 2008, S. 128–167; Berdiajew, Nikolai: Kommunismus und Religion, in: Ders.: Sinn und Schicksal des russischen Kommunismus. Ein Beitrag zur Psychologie und Soziologie



(7. Dezember 2016) sowie die GRK-Tagung »Mythos und Tabula Rasa – absoluter Anfang und totale Auslöschung als Denkform« (29.–31. Januar 2016) durch Vorführung von Filmen bzw. Reportagen sowie durch Analysen von wissenschaftlichen Aufsätzen vorbereitet. Sowohl vor dem Workshop als auch vor der Tagung haben wir die Kollegiaten gebeten,<sup>2</sup> ihre Gedanken und Fragen an die Vortragenden zu Papier zu bringen. Ihre Entwürfe werden hier verkürzt wiedergegeben. Sie dienen als Einführung zu diesem Sammelband und als Grundlage für weitere Reflexionen zum Thema »Mythos und Tabula rasa«.

## 1. MYTHEN ALS BELIEF SYSTEMS

Die Kollegiaten haben sich zunächst mit dem Thema »Mythen als *belief systems*« auseinandergesetzt. Im Vorfeld des gleichnamigen Workshops haben sie sich gefragt, welche Funktionen *belief systems* im Alltag erfüllen: Geht es um die Fundierung eines geteilten Wissens (so bei Wolterstorff) oder um die Negation eines solchen Wissens (so bei Sandkühler)?<sup>3</sup> Geht es um Kommunikationen zwischen Wissenskulturen bzw. um einen allgemeinen Bewertungsmaßstab von Wissenskulturen? Kann sich die Menge an *beliefs* im *belief system* im Laufe der Zeit vergrößern bzw. verkleinern oder werden bestimmte *beliefs*

---

des russischen Kommunismus, Luzern: Vita Nova Verlag 1937, S. 8–195; Klaudia Knaebel: Ein Mythos im Prozeß. Von der Heiligen zur Superwoman, Jeanne d'Arc im Film, in: Jörg Tüschmann/Annette Paatz (Hg.): Medienbilder, Dokumentation des 13. Film- und Fernsehwissenschaftlichen Kolloquiums an der Georg-August-Universität Göttingen Oktober 2000. Hamburg: Verlag Dr. Kovač 2001, S. 143–158; Winock, Michel: Jeanne d'Arc, in: Pierre Nora (Hg.): Erinnerungsorte Frankreichs. München: C. H. Beck Verlag 2005, S. 365–410; Radu, Robert: Art. Wirtschaftskrise/Wirtschaftswunder, in: Stephanie Wodianka/Juliane Ebert (Hg.): Metzlers Lexikon moderner Mythen. Figuren, Konzepte, Ereignisse. Stuttgart/Weimar: Metzler 2014, S. 391–395; Hacke, Jens: Die Bundesrepublik als Idee. Zur Legitimationsbedürftigkeit politischer Ordnung, in: Otto Depenheuer (Hg.): Erzählungen vom Staat. Ideen als Grundlage von Staatlichkeit. Wiesbaden: VS Verlag 2011, S. 115–135. Heer, Sebastian: Mythos und kollektive Selbsteutung. Das »Wirtschaftswunder« als transzendentes Fundament früher bundesrepublikanischer Ordnungskonstruktion, in: Werner J. Patzelt (Hg.), Die Machbarkeit politischer Ordnungen. Transzendenz und Konstruktion. Bielefeld: transcript Verlag 2013, S. 127–155.

**2** | Die Verwendung der männlichen Form hat hier ihre Berechtigung: Sämtliche Promovendinnen des GRK »Deutungsmacht« konnten in diesem Semester wegen Mutterschutz/Elternzeit bzw. wegen eines Auslandsaufenthaltes nicht an den Veranstaltungen des Kollegs teilnehmen.

**3** | Siehe Fußnote 1.

stets durch andere ersetzt (Tobias Götze<sup>4</sup>)? Sind *common sense*-Überzeugungen Voraussetzung für die Etablierung von *belief systems* oder bilden sie selbst ein *belief system* (Robert Brumme<sup>5</sup>) und was unterscheidet ein *belief system* von einem *knowledge system*? Die Tragweite dieser letzten Frage wurde während des Seminars am Beispiel der Shoah sichtbar. Hätten wir keine Möglichkeit, zwischen *belief* und *knowledge systems* zu unterscheiden, würde man dem Negationismus und dem Relativismus Tür und Tor öffnen.

Darüber hinaus wurden die Wechselbeziehungen zwischen der individuell-systemischen und der kollektiv-systemischen Ebene hinterfragt: Werden *belief systems* stets von Oben (*top-down*) aufoktroiert oder entstehen sie auf der individuellen Ebene? Gibt es einen Prozess der Harmonisierung von *belief systems* bzw. von Wissenskulturen, und wenn ja, wie verläuft er (Erik Grünke<sup>6</sup>)? Kann es *disbelief systems* geben (Tobias Götze)? Es wurde auch nach der Dynamik der spätmodernen *belief systems* gefragt sowie nach den Überzeugungen, die eine derartige Infragestellung aller Grundlagen erst ermöglichen (Tom Beyer<sup>7</sup>).

Weiterhin wurde versucht, den Unterschied zwischen Religion und *belief systems* mit Hilfe der Mengenlehre zu klären (Maximilian Herchen<sup>8</sup>). Ist Religion eine Teilmenge von *belief systems* oder steht sie außerhalb dieser? Gibt es noch weitere Teilmengen – so möglicherweise politische bzw. ökonomische *belief systems* – und, wenn »ja«, haben all diese Teilmengen einen Bezug zueinander? Sind alle *belief systems* irgendwie religiös geartet oder gehören die politischen Religionen zu einem extra *belief system*? Herr Herchen favorisiert den zweiten Zweig der Alternative, wobei eine scharfe Trennung der beiden Antworten seiner Meinung nach kaum möglich ist. Politische Religionen beruhen zwar auf religiösen Traditionen, können aber sehr wohl antireligiös sein. Außerdem entstehe die politische Religion nach Eric Voegelin aus einer engen Vermischung von Politik und Religion, bei der die Politik dominiere (Ersatzreligion).<sup>9</sup> Allerdings sei die Religion nicht erst als Teil eines politischen *belief system* politisch relevant, Religion habe immer auch politische Implikationen.

4 | Zum Dissertationsprojekt von Herrn Götze siehe: <https://www.deutungsmacht.uni-rostock.de/kolleg/mitglieder/kollegiatinnen/tobias-goetze/>.

5 | Zum Dissertationsprojekt von Herrn Brumme siehe: <https://www.deutungsmacht.uni-rostock.de/kolleg/mitglieder/kollegiatinnen/robert-brumme/>.

6 | Zum Dissertationsprojekt von Herrn Grünke siehe: <https://www.deutungsmacht.uni-rostock.de/kolleg/mitglieder/kollegiatinnen/erik-gruenke/>.

7 | Zum Dissertationsprojekt von Herrn Beyer siehe: <https://www.deutungsmacht.uni-rostock.de/kolleg/mitglieder/kollegiatinnen/tom-beyer/>.

8 | Zum Dissertationsprojekt von Herrn Herchen siehe: <https://www.deutungsmacht.uni-rostock.de/kolleg/mitglieder/kollegiatinnen/maximilian-herchen/>.

9 | Vgl. E. Voegelin: Die politischen Religionen; P. J. Opitz: Eric Voegelins Politische Religionen; E. Gentile: Le religioni della politica; J. Gebhardt: Wie vor-politisch ist »Religion«? S. 81-102.

Dennis Bastian Rudolf empfiehlt, sich dem Begriff des *belief system* nicht von der Seite der theologischen Philosophie, wie Wolterstorff es tut, sondern mit Milton Rokeach und Philip E. Converse von der Seite der Sozialpsychologie anzunähern.<sup>10</sup> Religiöse Überzeugungen sind laut Rudolf nur dann für die Sozialwissenschaft relevant, wenn sie innerhalb eines politischen *belief system* eine Rolle spielen und politische Religionen seien nichts weiter als funktionale Äquivalente von Religionen. Mit Giovanni Sartori sollten politische *belief systems* oder genauer politische *belief clusters* als Ideologien verstanden werden.<sup>11</sup> Der politische Mythos sei stets Ausdruck einer Ideologie. *Beliefs* senkten die Entscheidungskosten, weil sie zunächst ein Nachdenken überflüssig machten.

Robert Brumme stellt die Frage nach den Unterscheidungskriterien von Mythen und Ideologien. Unterscheiden sie sich hinsichtlich ihres »manipulativen« Charakters, ihrer Reichweite (Ideologie als allumfassendes *belief system*) oder aufgrund ihres politischen Anspruchs, ihrer religiösen Durchsetzung bzw. ihrer normativen Bedeutung? Ist Ideologie nicht auch »nur« Mythos, nur eben ein sehr vereinnahmender?

Sönke Pöppinghaus beschäftigt die Eigenart des demokratischen *belief system*.<sup>12</sup> Demokratie vertrage nur ein begrenztes Maß an Relativismus. Pöppinghaus fragt nach der Notwendigkeit einer Zivilreligion in der liberalen Demokratie. Ist eine solche Zivilreligion mit dem Pluralismus zu vereinbaren? Sollte nicht anstelle der Zivilreligion ein demokratisches Ethos der Toleranz angestrebt werden?

Die Stellungnahmen der Kollegiaten lassen sich in folgende Fragecluster zusammenfassen:

- Woher stammen die *belief systems* und woraus bestehen sie?
- Gibt es eine Hierarchie von *belief systems* bzw. eine Zirkulation der Überzeugungen zwischen unterschiedlichen *belief systems*?
- Lässt sich der Unterschied von Glauben und Wissen aufrechterhalten? Sind *belief systems* stets auch Wissenskulturen?
- Welchen Fundus an festen Überzeugungen braucht die angeblich grundlagenlose Spätmoderne?
- Worin besteht der Unterschied zwischen Religion und *belief systems*?

---

**10** | Vgl. M. Rokeach: *The Nature of Human Values*; ders.: *The Open and Close Mind*; P. E. Converse: *The Nature of Belief Systems in Mass Publics*, S. 206–261. Zum Dissertationsprojekt von Herrn Rudolf siehe: <https://www.deutungsmacht.uni-rostock.de/kolleg/mitglieder/kollegiatinnen/dennis-bastian-rudolf/>.

**11** | Vgl. G. Sartori: *Politics, Ideology, and Belief Systems*, S. 398–411.

**12** | Zum Dissertationsprojekt von Herrn Pöppinghaus siehe: <https://www.deutungsmacht.uni-rostock.de/kolleg/mitglieder/kollegiatinnen/soenke-poeppinghaus/>.



- Welchen Bezug gibt es zwischen Religion und politischen *belief systems*, vor allem, aber nicht nur, in den sog. politischen Religionen und Zivilreligionen?
- Welchen Bezug gibt es zwischen politischen *belief systems* und Ideologien?
- Welchen Bezug gibt es zwischen politischen Ideologien und Mythen? Sind beide *belief systems* oder sind Mythen nur Instrumente der Ideologien, verstanden als *belief systems*?
- Welche Rolle spielen *belief systems* und Zivilreligion in liberalen Demokratien?

Freilich konnten während des Workshops »Mythos als *belief system*« nicht all diese Fragen angesprochen und noch weniger beantwortet werden. Es wurde aber schnell klar, dass man zwischen einem sog. *common sense belief system* und kollektiv elaborierten *belief systems* unterscheiden sollte. Das erste besteht aus scheinbar »evidenten« Überzeugungen, die erst nach einem Prozess kritischer Überprüfung zur wissenschaftlichen Wissenskultur gehören können. Sie bilden die Voraussetzung jedes Wissens, können aber zugleich auch ein solches Wissen erschweren, ja sogar verhindern.

Neben der individuellen Ebene gibt es aber auch eine kollektive Dimension des Phänomens, die für die Problematik dieses Sammelbands von besonderer Bedeutung ist. *Belief systems* können die Gestalt von Religionen, politischen Ideologien bzw. Weltanschauungen, Zivil- und Ersatzreligionen annehmen. Sie werden dann durch Sozialisation und Propaganda weitervermittelt. Es ist davon auszugehen, dass der Mythos fester Bestandteil von derartigen kollektiven *belief systems* ist bzw. – wenn er so umfangreich ist wie z. B. der Sozialdarwinismus – selbst ein *belief system* bilden kann.

Meist entspringt der politische Mythos politischen Ideologien und Weltanschauungen, auch wenn sie nur selten einfache Werkzeuge in den Händen von »Mythosfabrikanten« sind. Laut Barthes geht der Mythos – als sekundäres semiologisches System – aus der Gestalt einer »exzessiv gerechtfertigten Aussage« hervor.<sup>13</sup> Eine Überwindung der Herrschaft der Bourgeoisie würde laut Barthes eine Aufhebung der bürgerlichen Ideologie und des Mythos nach sich ziehen. Er sei ein Instrument der Vormachtstellung des Bürgertums und sichere dessen kulturelle Hegemonie, indem er »die Realität der Welt in ein Bild der Welt, die Geschichte in Natur« verwandele. Barthes weigert sich, die bedeutenden Funktionen des Mythos über seine ideologische Dimension hinaus zu sehen. Dass eine (mythische) Arbeiterrevolution den Mythos überflüssig machen würde, ist kaum zu erwarten. Außerdem ist der Mythos nicht per se

---

13 | Vgl. R. Barthes: *Mythen des Alltags*, S. 113.

konservativ, er kann auch emanzipatorische Kräfte freisetzen.<sup>14</sup> Auch demokratische *belief systems* brauchen den Mythos als stabilisierende Instanz.<sup>15</sup>

## 2. POLITISCHER MYTHOS UND »TABULA RASA«

Der politische Mythos als *belief system* ist meist Gegenstand eines Kampfes um die Deutungsmacht. Er steht im Dienste von Identitätspolitik und Legitimierungsprozessen. Politische Mythen können aber auch dazu beitragen, tiefgehende Umbrüche aufzuarbeiten und zu bewältigen. Sie werden während und unmittelbar nach Krisen, Revolutionen und Kriegen, also in Zeiten einer angeblichen *tabula rasa*, zahlreicher.

Der Kollegiat Tom Beyer weist auf drei Wechselwirkungen zwischen Mythos und *tabula rasa* hin:

(1) Die *tabula rasa* bilde die Voraussetzung, um Mythen überhaupt erzählen zu können. Jede Narration brauche eine leere Wachstafel, auf die man sie schreiben könne.

(2) Der Mythos als Gründungserzählung bzw. als Erzählung eines Ursprungs bzw. einer Schöpfung evoziere stets das Bild der *tabula rasa*. Damit eine Narration mythisches Potenzial entfalten könne, d. h. fraglose Evidenz erzeuge, müsse sie im Idealfall so wirken, als hätte vor ihr nichts auf der leeren Tafel gestanden.

(3) Und zuletzt sei die *tabula rasa* selbst als ein Mythos – hier im Sinne einer Legende – zu betrachten, der Bedeutsamkeitsordnungen zu stürzen vermöge. Denn komplett leer könne eine Tafel niemals sein. Wir gingen immer schon »informiert« an Untersuchungsgegenstände heran, selbst dann, wenn wir versuchten, keinerlei subjektive Informationen an sie heranzutragen bzw. in die Untersuchung miteinzubeziehen.

Tobias Götze erinnert uns daran, dass bei Sokrates und später bei John Locke eine unbeschriebene (Wachs-)Tafel als Metapher für den menschlichen Geist dient, auf dem sich sukzessiv das und nur das einprägt, was der Mensch über seine Sinne wahrnimmt.<sup>16</sup> Die Metapher ermöglicht, alle vermeintlich

---

**14** | Vgl. Y. Bizeul: Theorien der politischen Mythen und Rituale, S. 15–39.

**15** | Vgl. Y. Bizeul: Vernetzte und kanonisierte politische Mythen in der modernen Demokratie, S. 109–139.

**16** | Platon sieht im Gedächtnis eine Art Wachstafel (Theaitetos 191c–d), während Aristoteles dieses Bild für den Intellekt verwendet, der als »leidender Geist« aus den Sinneswahrnehmungen entsteht (De anima III, 430 a). Locke hat diese u. a. von Ibn Tufail, einem Schüler Avicennas, benutzte Metapher übernommen und gegen die Angabe Descartes', es gäbe »angeborene Ideen«, die Ansicht vertreten, das blank paper – in Thomas Hobbes' Leviathan heißt es clean paper (Leviathan II, XXX) – werde durch die Erfahrung

*a priori* vorhandenen oder angeborenen Erkenntnisse zu negieren und andererseits genau das und nur das als Erkenntnisgrundlage zuzulassen, was uns über unsere Erfahrung zugänglich ist. Es geht um die Be-Gründung der empirischen Erkenntnislehre. Die Konstruktion eines Nullpunktes kann demnach als Strategie fungieren, um Deutungsmachtkonflikte zu verschleiern und auf diesem Weg selbst Deutungsmacht zu erlangen, indem die auf dem Nullpunkt aufbauenden Behauptungen jeglicher Rechtfertigung gegenüber etablierten Bewertungsmaßstäben enthoben sind.

Dennis Bastian Rudolf schlägt vor, diese These mit Hilfe des Vorländerischen Transzendenzverständnisses zu verschärfen.<sup>17</sup> Mit der Vorstellung des »neuen« absoluten Anfangs werden bestimmte Dinge undenkbar, unsagbar und unverfügbar; andere hingegen besonders hervorgehoben. Die bewusste Konstruktion eines Nullpunktes legitimiert daher eine scharfe vorher/nachher bzw. gut/schlecht Unterscheidung.

Die Metapher der *tabula rasa* erfüllt nach Sören Pöppinghaus zwar eine manipulative, aber zugleich auch strategisch-produktive Funktion. Modaltheoretisch formuliert, ließe sich mit Niklas Luhmann behaupten, dass die Vorstellung der *tabula rasa* notwendig sei, um kontingenten Entscheidungen einen Rückhalt im Unbezweifelbaren zu geben. Allerdings entsteht die Vorstellung des »vorgangslosen Anfangs« nicht immer aus einer bewusst getroffenen Entscheidung – wie gegen Luhmann zu behaupten wäre. Allein der Mythologe (oder die Mythologin), der (oder die) »von außen« auf die mythische Erzählung blickt, erkennt von eben jener Position der Beobachtung zweiter Ordnung aus, dass mythische Erzählungen auf einem kontingent gesetzten Anfang beruhen. Die Beobachtung zweiter Ordnung jenes Sachverhalts durch den Mythologen, also die Frage nach der Bedeutung der Vorstellung von *tabula rasa* als Vorstellung eines vorgangslosen Ursprungs für die Deutungsmacht des Mythos, kommt daher auch einem Reflexiv-Werden der Beobachtung erster Ordnung gleich.

Das wirft nach Pöppinghaus die Frage auf, inwiefern der Mythologe bzw. die Mythologin an den Mythos der *tabula rasa* glauben muss, um ihn zu verstehen. Vor diesem Hintergrund scheint ihm eher die gegenteilige Annahme plausibel: die Mythologin bzw. der Mythologe muss ihren bzw. seinen Glauben an den Mythos sozusagen suspendieren (nicht eliminieren!), um einen

---

beschrieben, wobei nach Lockes Überzeugung Kinder unterschiedlich angeborene Charaktere vorweisen (An Essay concerning Humane Understanding, 1690, II, 1, § 1), eine Vorstellung, die Condillac ablehnte (Traité des sensations, 1754).

**17** | Laut Hans Vorländer beruhen demokratische Verfassungsordnungen nicht nur auf Selbstgesetzgebung, sie greifen auch auf Geltungsressourcen zurück, über die sie nicht oder nur bedingt verfügen. Vgl. H. Vorländer (Hg.): Transzendenz und die Konstitution von Ordnungen; ders. (Hg.): Demokratie und Transzendenz.

klareren Blick auf die Strukturen des Mythos und seine Funktionsmechanismen zu bekommen. So verstanden, sind die Mythologin und der Mythologe analysierende Beobachtende der Mythen und derer, die an sie glauben, wobei sie stets ihre eigenen Beobachtungen und den Mythos reflektieren. Es geht aus dem operativen Hintergrund des Beobachtens hervor, dass die die Mythen und ihre Deutungsmacht Erforschenden die Frage stellen können, ob und inwiefern der Mythos der Vorstellung der *tabula rasa* bedarf.

Die Annahme der *tabula rasa*, sofern sie denn geglaubt wird, ist nichts anderes als eine wirkmächtige Konstruktion, die verdeckt, dass es niemals so etwas wie einen radikalen Neuanfang gibt. Dies zu behaupten heißt dann, dass die Vorstellung der *tabula rasa* einer Entscheidung gleichkommt. Sie verdeckt diesen Umstand, indem sie nicht sagt, dass sie nicht sagt, was sie nicht sagt,<sup>18</sup> nämlich: *tabula rasa* gibt es nie und wird es niemals geben. Doch der Mythos verhindert gerade die Erkenntnis dieser Annahme. Nur der Mythologe kann dies sehen, so dass sich die Frage stellt, inwiefern die Vorstellung einer *tabula rasa* für den Mythos und seine konstituierende Erzähllogik maßgeblich ist. Gehört die Annahme einer *tabula rasa* demnach notwendigerweise zum Funktionieren des Mythos? Existieren mythische Erzählungen, die ohne die Annahme einer *tabula rasa* auskommen und wirkmächtig würden? Diese Frage scheint laut Pöppinghaus die traditionelle Frage nach dem Problem einer ›*creatio ex nihilo*‹ zu berühren.

Die Kollegiaten gehen also von der Unmöglichkeit einer echten geschichtlichen *tabula rasa* aus. Sie würden lieber mit Jean-Jacques Derrida von einem »Palimpsest« und von einer »Wiederherstellung« Vergangenen sprechen.<sup>19</sup> Es lässt sich mit Tobias Götze fragen, inwiefern Dekonstruktionen für neue Narrative und neue Mythen entscheidend sind. Als neue Mythen beinhalten sie von sich aus eine gewisse gewünschte Originalität und Innovation, dürfen aber womöglich, um deutungsmächtig zu werden, nicht als radikal neu (dann: fremd) auftreten. Die Formel lautet infolgedessen: den Bedarf an Innovation decken (genug Neues), ohne dabei fremd zu wirken (zu viel Neues vermeiden). Anerkennung wird durch optimale Dekonstruktion gewährleistet, die nicht identisch mit maximaler Dekonstruktion ist. Das führt nach Maximilian Herchen zu der weiteren Frage, ob eine Auslöschung der Vergangenheit nicht gerade den Zweck hat, das Gegenteil zu erreichen, nämlich, wenn auch negativ, sich an etwas zu erinnern.

**18** | Vgl. N. Luhmann: Gibt es in unserer Gesellschaft noch unverzichtbare Normen? S. 21. Eine Kommunikation sagt nach Luhmann »was sie sagt, sie sagt nicht, was sie nicht sagt«. Vgl. N. Luhmann/P. Fuchs: Reden und Schweigen, S. 7.

**19** | Vgl. J.-J. Derrida: La forme et le vouloir-dire, S. 277–299; ders./F. C. T. Moore: White Mythology, S. 5–74, hier S. 10f.

# Mythos als belief system und Tabula rasa

---

Yves Bizeul

Der Mythos als Gründungsnarrativ erzählt von einem zeitlich verorteten Neuanfang, zugleich drückt er den festen Willen aus, den Gegenstand dieses künstlichen Konstrukts zu vernatürlichen und als ewig darzustellen. Jeanne d'Arc ist bei Michelet die Gründerin der französischen Nation, die paradoxerweise schon immer da war. Er nennt die Gallier »Kinder einer entstehenden Welt« und beschreibt sie als »groß, weich und blond« in Analogie zu Embryos.<sup>1</sup> Im Nachkriegsdeutschland erzählten die Mythen des Wirtschaftswunders in der Bundesrepublik und des Antifaschismus in der DDR von der angeblichen »Stunde Null« nach dem Zweiten Weltkrieg. Diese »Stunde Null« ist aber zugleich auch die wundersame Wiedergeburt der ewigen deutschen Nation. Sebastian Herr stellt fest, dass bei allem Neuanfang der oft proklamierten »Stunde Null« das Narrativ des deutschen Wirtschaftswunders »emotional-empathische Rückzugsräume des Erinnerns« bereitstellte. Es gab zahlreiche »Anschlussmöglichkeiten an die Vergangenheit« (VW-Käfer, Autobahn, Fleiß, Arbeitsmoral).<sup>2</sup> Man sprach damals übrigens von einem Wirtschaftswunder und nicht von einem Demokratiewunder, was auch der Grundhaltung der meisten Deutschen zu dieser Zeit entsprach. Mythen spielen oft bei der Verarbeitung des *horror vacui* eine entscheidende, als »riskante Erzählungen« (Münkler) aber auch eine äußerst ambivalente Rolle.<sup>3</sup> Der Mythos fungiert als Linse, »durch die wir die Welt sehen« (Bottici).<sup>4</sup>

---

1 | Nicht von ungefähr hat die Expertin für französische Literatur, Paule Petitier, auf die engen Beziehungen von Michelet und dem französischen Zoologen Etienne Geoffroy Saint-Hilaire, einem Vertreter der Embryologie, hingewiesen. Vgl. P. Petitier: *La Géographie de Michelet*, S. 131ff.

2 | S. Heer: *Mythos und kollektive Selbstdeutung*, S. 146f.

3 | Vgl. H. Münkler: *Der Antifaschismus als Gründungsmythos der DDR*, S. 221–235, hier S. 223.

4 | Vgl. C. Bottici: *A Philosophy of Political Myth*, S. 225.

So haben die Narrative der Renaissance und der Reformation Entwicklungen plastisch vorgeführt, die den meisten Zeitgenossen nicht völlig bewusst waren. Jean Brun beschreibt die Renaissance als eine Öffnung zur Welt. Man strebte damals zwar nach einer *restitutio* der Antike und einer *renovatio* des Menschen. In Wahrheit haben sich jedoch in der Frühen Neuzeit das Weltbild und das Verständnis der Seele pluralisiert und gewandelt.<sup>5</sup> Die Aufhebung des Einheitsgedankens und die Durchsetzung der Idee der Vielfalt führten als Reaktion zu einem Streben nach Harmonie und zur Entstehung mehrerer mythischer Narrative, so dem Mythos des neuzeitlichen Staates – eine *creatio ex nihilo*, die das Chaos in Ordnung überführen sollte (siehe hierzu etwa Machiavellis *Der Fürst*, die Utopien Morus', Campanellas oder Bacons, die Souveränitätslehren von Bodin und Hobbes) –, dem Mythos der neuzeitlichen Wissenschaft, deren Programm der Entschlüsselung des Alphabets der Natur oder dem Mythos der »Entzauberung der Welt« (Max Weber), der das Versprechen der umfassenden Beherrschung dieser beinhaltet. Auch die große Erzählung, wonach die korrupte Welt nur gerettet werden kann, indem man zurück zu den Ursprüngen, zu den Quellen gehen sollte, war bestimmend.

Die Reformation versprach ihrerseits die unmittelbare Beziehung des einzelnen Menschen zu Gott ohne vermittelnde (korrumpierende und korrumpierte) Zwischeninstanzen. Martin Luther selbst wurde später zum Gegenstand mehrerer Gründungsmythen. Er wurde als einfacher Mönch, der wie ein religiöser Galileo Galilei die Welt aus den Angeln hob, stilisiert. Später hat man in ihm den Gründer der deutschen Nation sehen wollen.<sup>6</sup>

Ein weiteres wichtiges mythisches Narrativ war die Überwindung von Tradition und Aberglaube, Unfreiheit und überkommenen Autoritäten durch den Gebrauch der Vernunft. Damit verbunden war die Metapher des Lichtes, welches die Dunkelheit aus der Welt vertreibt. Nicht zu Unrecht haben Horkheimer und Adorno die mythische Qualität der Aufklärung erkannt und Voegelin in der (Frühen) Neuzeit Parallelen zu Denkfiguren der Gnosis identifiziert.<sup>7</sup>

Der Mythos des Sozialvertrags ist eines der markantesten, frühen Beispiele für den Anspruch, die Moderne sollte »alles Normative aus sich selber« (Habermas) schöpfen.<sup>8</sup> Politische Ordnung und die Ausübung von Macht wurde auf die Zustimmung derjenigen, die dieser Macht unterworfen sind, zurückgeführt. Die Adressaten der Gesetze verstehen sich jetzt gleichzeitig gemeinsam auch als ihre Autoren. Einerseits sind solche Vorstellungen mit der Schaffung poli-

---

5 | Vgl. J. Brun: *L'Europe philosophe*, S. 139-153.

6 | Vgl. H. Lehmann: »Er ist wir selber: der ewige Deutsche«, S. 91-103; ders.: Martin Luther als deutscher Nationalheld im 19. Jahrhundert, S. 53-65.

7 | Vgl. M. Horkheimer/T. W. Adorno: *Dialektik der Aufklärung*; E. Voegelin: *Der Gottesmord*.

8 | Vgl. J. Habermas: *Der philosophische Diskurs der Moderne*, S. 31.

tischer Ordnung *ex nihilo* eng verbunden. Andererseits richtet sich diese Erzählung gegen eine Herrschaft, die sich auf Tradition und/oder transzendente Autoritäten stützen würde. »Das Volk«/»der demos«/»die Nation« werden im Zuge der Revolutionen zum maßgeblichen Subjekt der Politik. Mit ihnen ist stets auch die Befreiung von illegitimer Herrschaft verbunden, sei es das Ancien Régime oder später der drückenden Kolonialherrschaft. Zugleich wird »das Volk«, verstanden als die Gruppe der »einfachen Leute«, »der Armen« oder »der Unterprivilegierten«, gegen herrschende ökonomische und politische Eliten in Stellung gebracht. Auch die Revolution ist über die Geschehnisse selbst hinaus zu einem Mythos geworden, in marxistischer Lesart gar zu einer mythischen Weltrevolution, die sich am Horizont abzeichnet und eine Zeitenwende in Aussicht stellt, nicht weniger als das Ende der »Vorgeschichte der Menschheit« (Marx),<sup>9</sup> der Äon der Machtkämpfe und Leiden.

Unterdessen wurde die Ökonomie zum mythischen Narrativ einer »objectified reality« (Taylor),<sup>10</sup> die nicht nur verspricht, die soziale Welt verständlich und transparent (als Marktgeschehen rationaler Akteure) zu machen, sondern einen Mechanismus der friedlichen gesellschaftlichen Organisation bereitzuhalten (damit verbunden ist das Bild der »unsichtbaren Hand«, die widerstreitende Ziele koordiniert, ohne auf Zwang und Gewalt rekurren zu müssen). Schließlich ist hier die Geschichtsphilosophie zu nennen als jenes Hauptnarrativ, welches das 19. Jahrhundert prägte. Wie Armin Nassehi argumentiert, erlauben es die »Kollektivsingulare« Geschichte und Fortschritt, die sich sozial und funktional differenzierende moderne Gesellschaft als ein und dieselbe zu sehen. Beide würden sich auf ein Ziel zubewegen.<sup>11</sup> All diese mythischen Erzählungen, die aus sozialen, ökonomischen und politischen Krisen sowie aus technischen und wissenschaftlichen Transformationsprozessen entstanden sind, gehen mehr oder weniger bewusst von der Vorstellung der *tabula rasa* aus. Auf der Grundlage einer Überwindung von Traditionen und Vorurteilen macht die Moderne Platz für das Neue und soll die Konstruktion einer besseren innerweltlichen Zukunft ermöglichen. Die Avantgarde des (beginnenden) 20. Jahrhunderts setzt sich an die Spitze dieser Bewegung.

Aufgrund der Desillusionen des Fortschrittsglaubens, der aus den Katastrophen des 20. Jahrhunderts (Weltkriege, Ausschwitz, Gulag, Hiroshima usw.) folgte, ist später auch die Moderne selbst Gegenstand einer *tabula rasa* geworden. Doch die Postmoderne und das viel beschworene »Ende der großen Erzählungen« (Lyotard)<sup>12</sup> können selbst als mythische Narrative betrachtet werden, die Übersicht schaffen. Deutschland weist allerdings in dieser Beziehung

9 | Vgl. K. Marx: Zur Kritik der politischen Ökonomie, S. 7-160, hier S. 9.

10 | Vgl. C. Taylor: Modern Social Imaginaries, S. 69ff.

11 | Vgl. A. Nassehi: Die Zeit der Gesellschaft, S. 316f.

12 | Vgl. J.-F. Lyotard: Das postmoderne Wissen.



eine gewisse Unzeitlichkeit auf: Als sich die Aufklärung in Europa und den USA verbreitete, triumphierte hier das Gegenarrativ der Romantik. Aus verständlichen Gründen wurde in der Nachkriegszeit in der neuen Bundesrepublik neben dem Bewusstsein der Dialektik der Aufklärung bzw. der Moderne der von dem Historiker Heinrich August Winkler positiv betrachtete »lange Weg nach Westen« zur dominanten mythischen Narration, welche den früheren »deutschen Sonderweg« ablösen sollte.<sup>13</sup>

Heute herrscht im Westen der überaus komplexe Globalisierungsmythos in all seinen Facetten (*market globalism*, *justice globalism*, *jihadist globalism*; aber auch: *clash of civilizations*).<sup>14</sup> Bezeichnend ist, dass Globalisierung stets als ein Kampf um eine neue Ordnung geschildert wird, wobei der Frontverlauf erwartungsgemäß sehr unterschiedlich gedeutet wird. Globalisierung und multipolare Welt sollen aus der *tabula rasa* des Kalten Krieges entstanden sein. Parallel zur Erzählung der Entgrenzung und der multipolaren bzw. multikulturellen Welt ist derzeit auch eine starke Sehnsucht nach Gemeinschaft zu verzeichnen. Dazu passen die Narrative des Kommunitarismus, die eine Antwort auf einen Liberalismus, der sich allein auf das Individuum stützen zu können meint, liefern wollen. Hierher gehört aber auch die an allen Ecken und Enden stattfindende Suche nach authentischen kollektiven Identitäten, die sowohl eine emanzipatorische als auch eine zutiefst reaktionäre Gestalt annehmen können. In vielen neuen politischen Bewegungen sehnt man sich nach einer *tabula rasa* des Neoliberalismus und des Individualismus.

Zugleich ist mit dem Internet eine neue Welt angeblicher Freiheit und Gleichheit entstanden, die sich weitgehend von der politischen Welt der Staaten losgesagt hat. Zu dieser mythischen Erzählung gehört nicht nur die angenommene Überlegenheit der *digital natives*, sondern auch der andauernde Befreiungskampf gegen die Einmischung durch Staaten und Konzerne, indem Hacker zu Helden werden. Mittlerweile verfügen wir sogar über eine »Unabhängigkeitserklärung des Cyberspace« (Barlow).<sup>15</sup>

---

**13** | Vgl. H. A. Winkler: Der lange Weg nach Westen. Siehe hierzu den Aufsatz von Matthias Waechter in diesem Band.

**14** | Vgl. U. Steger (Hg.): Facetten der Globalisierung. Siehe hierzu u. a.: Y. Bizeul: Struktur und Funktion patchworkartiger politischer Mythen in den hochmodernen Gesellschaften, S. 81–99; Y. Bizeul: Politische Mythen im Zeitalter der »Globalisierung«, S. 17–36.

**15** | Vgl. Barlow, John Perry: A Declaration of the Independence of Cyberspace (1996), in: <https://www.eff.org/cyberspace-independence> vom 30.06.2016.

## SCHLUSSFOLGERUNGEN

All diese Beispiele zeugen von der Bedeutung und den strategisch-produktiven Funktionen der *tabula rasa*-Narrative in der politischen Mythologie. Die Dekonstruktion der Vergangenheit wird oft nur als Vorstufe eines Neuanfangs erzählt, der allerdings viel von der Vergangenheit übernimmt und neudeutet. Claus Leggewie hat auf fünf Funktionen des Mythos nach einem Neuanfang hingewiesen: Er soll dabei helfen:

- krisenhafte Übergänge zu bewältigen,
- sozialstrukturelle Spaltungen aufzuheben,
- eine neue Entwicklung zu ermöglichen,
- die Geschichte vergessen zu machen
- und Generationen zu verbinden.<sup>16</sup>

Alle fünf Aufgaben erfüllen letztendlich Brückenfunktionen. Das *tabula rasa*-Narrativ erleichtert Transformationsprozesse, die nach einem Bruch in Gang gesetzt werden und wiederum durch den Mythos leichter bewältigt werden sollen. Es verspricht die Entstehung einer besseren, neuen Welt.

Auch in diesem Fall wird der Mythos von Riten begleitet. Für Cassirer sind der Mythos als episches Element und der Ritus als dramatisches Element zwei Seiten einer selben Medaille.<sup>17</sup> Cassirer betrachtet den Ritus als »Lebensprinzip« des Mythos<sup>18</sup> und Claude Rivière erläutert in seinem Buch *Les Liturgies politiques* die Wechselbeziehung zwischen Mythen und Ritualen: »Der Mythos«, schreibt er, »macht den Ritus glaubhaft und legitimiert ihn, indem er ihm Signifikate zuweist. Dafür vergegenwärtigt der Ritus den Mythos und sorgt für seine Erhaltung, indem er seine Wiederkehr sichert und ihn in einer konkreten wie auch affektiven Form vorführt. Das in *illo tempore* des Ursprungs geht in dem *hic et nunc* in Erfüllung«.<sup>19</sup>

Der Ritus hilft im Falle einer *tabula rasa*, den Bruch im geschichtlichen Ablauf durch Kontinuitätserzeugung zu kitten. Zeremonien, die zeitlich in regelmäßigen Abständen stattfinden, erinnern an den Neuanfang, vermitteln jedoch zugleich auch den Anschein, als hätte man es danach mit einer lückenlosen Dauerhaftigkeit zu tun. Diese beruhigende und psychisch stabilisierende Botschaft, die schon in der Narrativität des Mythos selbst zu finden ist und einen wichtigen Beitrag zur Konstruktion einer narrativen Identität liefert, findet eine angebliche Bestätigung in der ritualisierten Wiederkehr des Selben.

16 | Vgl. C. Leggewie: Der Mythos des Neuanfangs, S. 275–302, hier S. 288.

17 | Vgl. E. Cassirer: Vom Mythos des Staates, S. 41.

18 | Vgl. E. Cassirer: Versuch über den Menschen, S. 127.

19 | Vgl. C. Rivière: Les Liturgies politiques, S. 13.

Und dennoch sollte man dem Beispiel Hannah Arendts und Paul Ricœurs folgen. Beide haben die Moderne angesichts der Gefahr des Totalitarismus nicht als *tabula rasa* der Vergangenheit betrachtet, sondern als Prozess allmählicher Reformen, der sich von jeglicher politischen Hybris fernhalten sollte. Johann Michel spricht in diesem Zusammenhang von einem »*modernisme paradoxal*«, also von einem »paradoxalen Moderneverständnis«. <sup>20</sup> Gerade die Hybris im *tabula rasa*-Gestus macht diesen aus der Sicht des Beobachters zweiter Ordnung nicht nur unglaublich, sondern auch zu einer Bedrohung für die Zukunft.

## **BIBLIOGRAFIE (»ARBEITSKONTEXT UND AUSGANGSFRAGEN«/ »MYTHOS ALS BELIEF SYSTEM UND TABULA RASA«)**

- Aristoteles: Über die Seele – De anima. Hamburg: Meiner Verlag 2017.
- Barthes, Roland: Mythen des Alltags. Frankfurt a. M.: Suhrkamp 2012.
- Barthes, Roland: Der Mythos heute, in: Ders.: Mythen des Alltags. Frankfurt a. M.: Suhrkamp 1981, S. 251–279.
- Berdiajew, Nikolai: Kommunismus und Religion, in: Ders.: Sinn und Schicksal des russischen Kommunismus. Ein Beitrag zur Psychologie und Soziologie des russischen Kommunismus. Luzern: Vita Nova Verlag 1937, S. 8–195.
- Bizeul, Yves: Theorien der politischen Mythen und Rituale, in: Ders. (Hg.): Politische Mythen und Rituale in Deutschland. Frankreich und Polen. Berlin: Duncker & Humblot (Reihe »Ordo Politicus«) 2000, S. 15–39.
- Bizeul, Yves: Vernetzte und kanonisierte politische Mythen in der modernen Demokratie, in: Stephanie Wodianka/Juliane Ebert (Hg.): Inflation der Mythen? Zur Vernetzung und Stabilität eines modernen Phänomens. Bielefeld: transcript Verlag 2016, S. 109–139.
- Bizeul, Yves: Struktur und Funktion patchworkartiger politischer Mythen in den hochmodernen Gesellschaften, in: Stephanie Wodianka/Dietmar Rieger (Hg.): Mythosaktualisierungen. Tradierungs- und Generierungspotentiale einer alten Erinnerungsform. Berlin/New York: Walter de Gruyter Verlag 2006, S. 81–99.
- Bizeul, Yves: Politische Mythen im Zeitalter der »Globalisierung«, in: Klaudia Knabel/Dietmar Rieger/Stephanie Wodianka (Hg.): Nationale Mythen – kollektive Symbole. Funktionen, Konstruktionen und Medien der Erinnerung. Göttingen: Vandenhoeck & Ruprecht 2005, S. 17–36.
- Bottici, Chiara: A Philosophy of Political Myth. Cambridge u. a.: Cambridge University Press 2007.

---

**20** | Vgl. J. Michel: Le modernisme paradoxal de Paul Ricœur, S. 643–657.

- Bottici, Chiara: The need for myth, in: Dies.: A Philosophy of Political Myth. Cambridge: Cambridge University Press 2007, S. 83–130.
- Brun, Jean: L'Europe philosophe. 25 siècles de pensée occidentale. Paris: Stock 1988.
- Cassirer, Ernst: Vom Mythos des Staates. Hamburg: Felix Meiner Verlag 2002.
- Cassirer, Ernst: Versuch über den Menschen. Einführung in eine Philosophie der Kultur. Hamburg: Felix Meiner Verlag 2007.
- Condillac, Étienne Bonnot de: Traité des sensations suivi du Traité des animaux. Fayard. Paris 1984.
- Converse, Philip E.: The Nature of Belief Systems in Mass Publics, in: David Apter (Hg.): Ideology and Discontent. New York: Free Press 1964, S. 206–261.
- Cuneo, Terence (Hg.): Nicholas Wolterstorff, Practices of Belief. Selected Essays II. Cambridge: Cambridge University Press 2014.
- Derrida, Jean-Jacques: La forme et le vouloir-dire. Note sur la phénoménologie du langage, in: Revue internationale de Philosophie 3/81 (1967), S. 277–299.
- Derrida, Jean-Jacques/Moore, F. C. T.: White Mythology: Metaphor in the Text of Philosophy, in: New Literary History 1/6 (1974), S. 5–74.
- Dörner, Andreas: Politischer Mythos als semiotische Gattung, in: Ders.: Politischer Mythos und symbolische Politik. Opladen: Westdeutscher Verlag 1995, S. 76–96.
- Flood, Christopher: Myth and ideology, in: Kevin Schilbrack (Hg.): Thinking Through Myths. London: Routledge 2002, S. 174–190.
- Gebhardt, Jürgen: Wie vor-politisch ist »Religion«? Anmerkungen zu Eric Voegelins Studie »Die politischen Religionen«, in: Herfried Münkler (Hg.): Bürgerreligion und Bürgertugend. Debatten über die vorpolitischen Grundlagen politischer Ordnung. Baden-Baden: Nomos 1996, S. 81–102.
- Gentile, Emilio: Le religioni della politica. Fra democrazie e totalismi. Rom: Laterza 2007.
- Habermas, Jürgen: Der philosophische Diskurs der Moderne. Zwölf Vorlesungen. Frankfurt a. M.: Suhrkamp 1985.
- Hacke, Jens: Die Bundesrepublik als Idee. Zur Legitimationsbedürftigkeit politischer Ordnung, in: Otto Depenheuer (Hg.): Erzählungen vom Staat. Ideen als Grundlage von Staatlichkeit. Wiesbaden: VS Verlag 2011, S. 115–135.
- Heer, Sebastian: Mythos und kollektive Selbstdeutung. Das »Wirtschaftswunder« als transzendentes Fundament früher bundesrepublikanischer Ordnungskonstruktion, in: Werner J. Patzelt (Hg.): Die Machbarkeit politischer Ordnungen. Transzendenz und Konstruktion. Bielefeld: transcript Verlag 2013, S. 127–155.
- Hobbes, Thomas: Leviathan. Oxford: Oxford University Press 2009.
- Horkheimer, Max/Adorno, Theodor W.: Dialektik der Aufklärung. Frankfurt a. M.: S. Fischer 1969.

- Klaudia Knabel: Ein Mythos im Prozeß. Von der Heiligen zur Superwoman, Jeanne d'Arc im Film, in: Jörg Türschmann/Annette Paatz (Hg.): Medienbilder, Dokumentation des 13. Film- und Fernsehwissenschaftlichen Kolloquiums an der Georg-August-Universität Göttingen Oktober 2000. Hamburg: Verlag Dr. Kovač 2001, S. 143–158.
- Koschorke, Albrecht: Universalität des Erzählens, in: Ders.: Wahrheit und Erfindung: Grundzüge einer Allgemeinen Erzähltheorie. Frankfurt a. M.: S. Fischer 2012, S. 9–26.
- Leggewie, Claus: Der Mythos des Neuanfangs: 1949 – 1968 – 1989, in: Helmut Berding (Hg.): Mythos und Nation. Studien zur Entwicklung des kollektiven Bewußtseins in der Neuzeit 3. Frankfurt a. M.: Suhrkamp 1996, S. 275–302.
- Lévi-Strauss, Claude: Die Struktur der Mythen, in: Ders.: Strukturelle Anthropologie. Frankfurt a. M.: Suhrkamp 1969, S. 226–254.
- Lehmann, Hartmut: »Er ist wir selber: der ewige Deutsche«. Zur langanhaltenden Wirkung der Lutherdeutung von Heinrich von Treitschke, in: Gerd Krumeich/Hartmut Lehmann (Hg.), »Gott mit uns«. Nation Religion und Gewalt im 19. und frühen 20. Jahrhundert. Göttingen: Vandenhoeck & Ruprecht 2000, S. 91–103.
- Lehmann, Hartmut: Martin Luther als deutscher Nationalheld im 19. Jahrhundert, in: Luther. Zeitschrift der Luthergesellschaft 1 (1984), S. 53–65.
- Locke, John: An Essay concerning Humane Understanding. Oxford: An Essay concerning Humane Understanding. Oxford 1975.
- Luhmann, Niklas: Gibt es in unserer Gesellschaft noch unverzichtbare Normen? Heidelberger Universitätsreden, Bd. 4, Vortrag: 10. Dezember 1992, Heidelberg: C. F. Müller Juristischer Verlag 1993.
- Luhmann, Niklas/Fuchs, Peter: Reden und Schweigen. Frankfurt a. M.: Suhrkamp 1989.
- Lyotard, Jean-François: Das postmoderne Wissen. Ein Bericht. Wien: Passagen Verlag 2009.
- Marx, Karl: Zur Kritik der politischen Ökonomie, Vorwort, in: MEW Band 13. Berlin: Dietz Verlag 1990, S. 7–160.
- Michel, Johann: Le modernisme paradoxal de Paul Ricœur, in: Archives de Philosophie 4/67 (2004), S. 643–657.
- Münkler, Herfried: Politische Mythen. Die Bewältigung von Kontingenz, die Klärung der Loyalität und die Reduktion von Komplexität, in: Vorgänge 46/1 (2007), S. 5–11.
- Münkler, Herfried: Der Antifaschismus als Gründungsmythos der DDR, in: Reinhard Brandt/Steffen Schmidt, (Hg.): Mythos und Mythologie. Berlin: De Gruyter 2004, S. 221–235.
- Nassehi, Armin: Die Zeit der Gesellschaft. Auf dem Weg zu einer soziologischen Theorie der Zeit. Opladen: Westdeutscher Verlag 1993.

- Opitz, Peter J.: Eric Voegelins *Politische Religionen*. Kontexte und Kontinuitäten, in: Occasional Papers. Eric-Voegelin-Archiv. Ludwig-Maximilians-Universität München – XLVII – 2006.
- Petitier, Paule: La Géographie de Michelet. Territoire et modèles naturels dans les premières œuvres de Michelet. Paris: L'Harmattan 1997.
- Platon: theaitetos, in: Platons Werke. Berlin: Georg Reimer 1856.
- Pouillon, Jean: Die mythische Funktion, in: Neue Folge, Band 220. Frankfurt a. M.: Suhrkamp 1984, S. 68–83.
- Radu, Robert: Art. Wirtschaftskrise/Wirtschaftswunder, in: Stephanie Wodianka/Juliane Ebert (Hg.): Metzlers Lexikon moderner Mythen. Figuren, Konzepte, Ereignisse. Stuttgart/Weimar: Metzler 2014, S. 391–395.
- Rivière, Claude: Les Liturgies politiques. Paris: Presses universitaires de France 1988.
- Rokeach, Milton: The Nature of Human Values. New York: Free Press 1973.
- Rokeach, Milton: The Open and Close Mind. New York: Basic Books 1960.
- Sandkühler, Hans Jörg: Wissen als gerechtfertigte wahre Überzeugung? Plädoyer für eine wahrheitstheoretisch bescheidene Philosophie, in: Ders.: Philosophie wozu?. Frankfurt a. M.: Suhrkamp 2008, S. 128–167.
- Sartori, Giovanni: Politics, Ideology, and Belief Systems, in: The American Political Science Review 2/63 (Jun., 1969), S. 398–411.
- Steger, Ulrich (Hg.): Facetten der Globalisierung. Ökonomische, soziale und politische Aspekte. Berlin u. a.: Springer Verlag 1999.
- Taylor, Charles: Modern Social Imaginaries, Durham, N. C.: Duke University Press 2004.
- Voegelin, Eric: Der Gottesmord. Zur Genese und Gestalt der modernen politischen Gnosis. Hg. und eingeleitet von Peter J. Opitz. München: Wilhelm Fink Verlag 1999.
- Voegelin, Eric: Die politischen Religionen, hrsg. von Peter J. Opitz. München: Fink, 1993.
- Vorländer, Hans (Hg.): Demokratie und Transzendenz. Die Begründung politischer Ordnungen. Bielefeld: transcript Verlag 2013.
- Vorländer, Hans (Hg.): Transzendenz und die Konstitution von Ordnungen. Berlin/Boston: De Gruyter 2013.
- Winkler, Heinrich August: Der lange Weg nach Westen. Bd. 1: Deutsche Geschichte vom Ende des Alten Reiches bis zum Untergang der Weimarer Republik, Bd. 2: Deutsche Geschichte vom ›Dritten Reich‹ bis zur Wiedervereinigung. München: C. H. Beck Verlag 2000.
- Winock, Michel: Jeanne d'Arc, in: Pierre Nora (Hg.): Erinnerungsorte Frankreichs. München: C. H. Beck Verlag 2005, S. 365–410.
- Wodianka, Stephanie: Mythos und Erinnerung. Mythentheoretische Modelle und ihre gedächtnistheoretischen Implikationen, in: Günter Oesterle (Hg.): Erinnerung, Gedächtnis, Wissen. Studien zur kulturwissenschaft-

lichen Gedächtnisforschung. Göttingen: Vandenhoeck & Ruprecht 2005, S. 211–230.

Woltersdorff, Nicholas: Thomas Reid and the Story of Epistemology. Cambridge: Cambridge University Press 2001.
